# Supplementary material
Source: PubMed Central journal article supplement (PMC1765428)

## *Scherffelia dubia*

### A. COPII-type 70 nm (n=233)

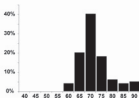

## *Arabidopsis thaliana*

### B. COPII-type 60 nm (n=25)

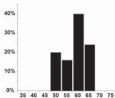

### C. COPIa-type 55 nm (n=314)

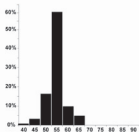

### D. COPIa-type 45 nm (n=31)

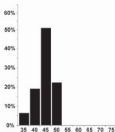

### E. COPIb-type 55 nm (n=1623)

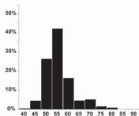

### F. COPIb-type 45 nm (n=51)

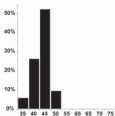

Supplement: pnas_0609818104_3.pdf [file pnas_0609818104_3.pdf]
