# Supplementary material
Source: PubMed Central journal article supplement (PMC1765428)

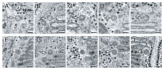

Supplement: pnas_0609818104_1.pdf [file pnas_0609818104_1.pdf]

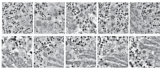

Supplement: pnas_0609818104_2.pdf [file pnas_0609818104_2.pdf]

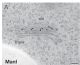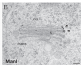

Supplement: pnas_0609818104_4.pdf [file pnas_0609818104_4.pdf]
